# Supplementary material for: Development and validation of a model for predicting acute kidney injury after cardiac surgery in patients of advanced age
Source: PubMed Central journal article supplement (PMC7898501; doi:10.1111/jocs.15249), 2020-12-12

## Certification

**Manuscript ID: JOCS-2020-OA-1367**

**Journal of Cardiac Surgery**

**Dear editor:**

**The Manuscript ID: JOCS-2020-OA-1367, Titled “Development and validation of a model for predicting acute kidney injury after cardiac surgery in patients of advanced age” has been submitted to the professional statistical department for analysis and review. The statistical analysis method is reliable and the processing of the data are detailed and reliable.**

**Sincerely,**

**Nutritional Epidemiology Institute, Tianjin Medical University, Tianjin,**

**China.**

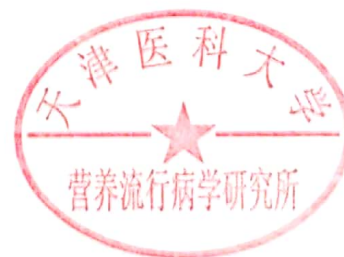

Supplement: JOCS-36-806-s002.pdf [file JOCS-36-806-s002.pdf]
